# Supplementary material
Source: PubMed Central journal article supplement (PMC3421820)
Supplement: JCM.01172-12_zjm999091884so1.pdf [file JCM.01172-12_zjm999091884so1.pdf]

TABLE S1

LIMITING DILUTION DATA FROM 5'UTR AND CODING REGION  
NESTED PCRs USED FOR VIRUS TYPING

| Virus Species       | Region | RNA copies / reaction |       |      |     |     |     |     |      | Calculated copies/ $\mu$ l |
|---------------------|--------|-----------------------|-------|------|-----|-----|-----|-----|------|----------------------------|
|                     |        | 600000                | 60000 | 6000 | 600 | 60  | 6   | 0.6 | 0.06 |                            |
| <i>Enterovirus</i>  |        |                       |       |      |     |     |     |     |      |                            |
| A                   | VP1    | 6/6                   | 6/6   | 6/6  | 6/6 | 0/6 | 0/6 | 0/6 | 0/6  | 275.0                      |
| B                   | VP1    | 6/6                   | 6/6   | 6/6  | 6/6 | 6/6 | 4/6 | 0/6 | 0/6  | 4.9                        |
| C                   | VP2    | 6/6                   | 6/6   | 6/6  | 3/6 | 0/6 | 0/6 | 0/6 | 0/6  | 869.7                      |
| D                   | VP1    | 6/6                   | 6/6   | 6/6  | 5/6 | 1/6 | 0/6 | 0/6 | 0/6  | 275.0                      |
| <i>Parechovirus</i> |        |                       |       |      |     |     |     |     |      |                            |
| HPeV1               | VP1    | 6/6                   | 6/6   | 6/6  | 6/6 | 6/6 | 2/6 | 0/6 | 0/6  | 15.4                       |
| <i>Enterovirus</i>  |        |                       |       |      |     |     |     |     |      |                            |
| A                   | VP4    | 6/6                   | 6/6   | 6/6  | 6/6 | 2/6 | 0/6 | 0/6 | 0/6  | 154.4                      |
| B                   | VP4    | 6/6                   | 6/6   | 6/6  | 6/6 | 6/6 | 0/6 | 0/6 | 0/6  | 27.5                       |
| C                   | VP4    | 6/6                   | 6/6   | 6/6  | 6/6 | 5/6 | 2/6 | 0/6 | 0/6  | 20.1                       |
| D                   | VP4    | 6/6                   | 6/6   | 6/6  | 6/6 | 5/6 | 0/6 | 0/6 | 0/6  | 34.6                       |
| <i>Rhinovirus</i>   |        |                       |       |      |     |     |     |     |      |                            |
| HRVA                | VP4    | 6/6                   | 6/6   | 6/6  | 6/6 | 0/6 | 0/6 | 0/6 | 0/6  | 275.0                      |
| HRVB                | VP4    | 6/6                   | 6/6   | 6/6  | 6/6 | 6/6 | 6/6 | 0/6 | 0/6  | 2.7                        |
| HRVCc               | VP4    | 6/6                   | 6/6   | 6/6  | 4/6 | 0/6 | 0/6 | 0/6 | 0/6  | 489.7                      |
| HRVCa               | VP4    | 6/6                   | 6/6   | 6/6  | 4/6 | 3/6 | 0/6 | 0/6 | 0/6  | 178.1                      |
| <i>Enterovirus</i>  |        |                       |       |      |     |     |     |     |      |                            |
| A                   | 5'UTR  | 6/6                   | 6/6   | 6/6  | 6/6 | 6/6 | 6/6 | 2/6 | 0/6  | 1.5                        |
| B                   | 5'UTR  | 6/6                   | 6/6   | 6/6  | 6/6 | 6/6 | 6/6 | 4/6 | 0/6  | 0.5                        |
| C                   | 5'UTR  | 6/6                   | 6/6   | 6/6  | 6/6 | 6/6 | 0/6 | 0/6 | 0/6  | 27.5                       |
| D                   | 5'UTR  | 6/6                   | 6/6   | 6/6  | 6/6 | 6/6 | 5/6 | 1/6 | 0/6  | 2.7                        |
| <i>Rhinovirus</i>   |        |                       |       |      |     |     |     |     |      |                            |
| HRVA                | 5'UTR  | 6/6                   | 6/6   | 6/6  | 1/6 | 0/6 | 0/6 | 0/6 | 0/6  | 2183.4                     |
| HRVB                | 5'UTR  | 6/6                   | 6/6   | 6/6  | 6/6 | 6/6 | 3/6 | 1/6 | 0/6  | 6.1                        |
| HRVCa               | 5'UTR  | 6/6                   | 6/6   | 6/6  | 6/6 | 2/6 | 0/6 | 0/6 | 0/6  | 154.4                      |
| HRVCc               | 5'UTR  | 6/6                   | 6/6   | 6/6  | 6/6 | 6/6 | 5/6 | 4/6 | 0/6  | 0.5                        |
| <i>Parechovirus</i> |        |                       |       |      |     |     |     |     |      |                            |
| HPeV-1              | 5'UTR  | 6/6                   | 6/6   | 6/6  | 6/6 | 6/6 | 6/6 | 0/6 | 0/6  | 2.7                        |
